# Supplementary material
Source: ML conference proceedings conference paper supplement (https://proceedings.neurips.cc/paper_files/paper/2020/hash/186b690e29892f137b4c34cfa40a3a4d-Abstract.html)
Supplement: Supplementary file [file 186b690e29892f137b4c34cfa40a3a4d-Supplemental.pdf]

## Appendix

### MMD biased estimator

Eq. 12 provides an unbiased empirical estimator of MMD. This estimator requires computing the non-diagonal elements of the Gramian of all the samples (i.e. all possible  $k(x, x')$  with  $x \neq x'$ ) which time complexity scales quadratically with the number of samples. If the feature map  $\phi$  can be defined explicitly, a biased estimator of MMD squared is

$$\hat{d}_{\text{MMD}}(\hat{p}, p)^2 = \left\| \frac{1}{N} \sum_{i=1}^N \phi(x_i) - \frac{1}{M} \sum_{j=1}^M \phi(x'_j) \right\|_{\mathcal{H}}^2.$$

This estimator time complexity scales linearly with the number of samples.

### Derivation of the score function estimator of MMD's gradient

We need to compute

$$\nabla_{\theta} d_{\text{MMD}}(\hat{p}, p)^2 = \nabla_{\theta} \mathbb{E}_{x, x' \sim p} [k(x, x')] - 2 \nabla_{\theta} \mathbb{E}_{x \sim \hat{p}, x' \sim p} [k(x, x')].$$

where the dependence on  $\theta$  is in the expectations over  $p(\theta)$ . The log-derivative trick allows us to rewrite the gradient of  $\nabla_{\theta} \mathbb{E}_{x \sim p(\theta)} [f(x)]$  as

$$\begin{aligned} \nabla_{\theta} \mathbb{E}_{x \sim p(\theta)} [f(x)] &= \int_x \nabla_{\theta} p(x; \theta) f(x) dx \\ &= \int_x p(x; \theta) \nabla_{\theta} \log p(x; \theta) f(x) dx = \mathbb{E}_{x \sim p(\theta)} [\nabla_{\theta} \log p(x; \theta) f(x)]. \end{aligned}$$

Then

$$\begin{aligned} \nabla_{\theta} \mathbb{E}_{x, x' \sim p} [k(x, x')] &= \mathbb{E}_{x, x' \sim p} [(\nabla_{\theta} \log p(x; \theta) + \nabla_{\theta} \log p(x'; \theta)) k(x, x')] \\ &= 2 \mathbb{E}_{x, x' \sim p} [\nabla_{\theta} \log p(x'; \theta) k(x, x')] \end{aligned}$$

and

$$\nabla_{\theta} \mathbb{E}_{x \sim \hat{p}, x' \sim p} [k(x, x')] = \mathbb{E}_{x \sim \hat{p}, x' \sim p} [\nabla_{\theta} \log p(x'; \theta) k(x, x')].$$

Finally,

$$\nabla_{\theta} d_{\text{MMD}}(\hat{p}, p)^2 = 2 \mathbb{E}_{x, x' \sim p} [\nabla_{\theta} \log p(x'; \theta) k(x, x')] - 2 \mathbb{E}_{x \sim \hat{p}, x' \sim p} [\nabla_{\theta} \log p(x'; \theta) k(x, x')].$$
